# Supplementary material
Source: MDPI journal article supplement (https://www.mdpi.com/search?q=water-12-03522)
Supplement: s001 [file water-12-03522-s001.pdf]

# Fish Community Responses to Human-Induced Stresses in the Lower Mekong Basin

Vanna Nuon <sup>1,2,\*</sup>, Sovan Lek <sup>3,4</sup>, Peng Bun Ngor <sup>4,5</sup>, Nam So <sup>1,4</sup>, and Gaël Grenouillet <sup>3,6</sup>

<sup>1</sup> Mekong River Commission Secretariat, P.O. Box 6101, 184 Fa Ngoum Road, Unit 18, Vientiane 01000, Laos; sonam@mrcmekong.org

<sup>2</sup> Cambodia National Mekong Committee, No. 576, National Road No. 2, Sangkat Chak Angre Krom, Khan Meanchey, Phnom Penh 12300, Cambodia

<sup>3</sup> Laboratoire Evolution et Diversité Biologique, UMR5174, Université de Toulouse III Paul Sabatier, CNRS, IRD, Toulouse 31062, France; sovan.lek@univ-tlse3.fr (S.L.); gael.grenouillet@univ-tlse3.fr (G.G.)

<sup>4</sup> Inland Fisheries Research and Development Institute, Fisheries Administration, No. 186, Preah Norodom Blvd., P.O. Box 582, Phnom Penh 12300, Cambodia; pengbun.ngor@gmail.com

<sup>5</sup> Wonders of the Mekong Project, c/o Inland Fisheries Research and Development Institute, Fisheries Administration, No. 186, Preah Norodom Blvd., P.O. Box 582, Phnom Penh 12300, Cambodia

<sup>6</sup> Institut Universitaire de France, 75231 Paris, France

\* Correspondence: vannanuon88@gmail.com

**Figure S1.** Sampling effort at 25 sites from 2007 to 2018. The black squares represent the sampling years for each site, and the small dots indicate the missing data.

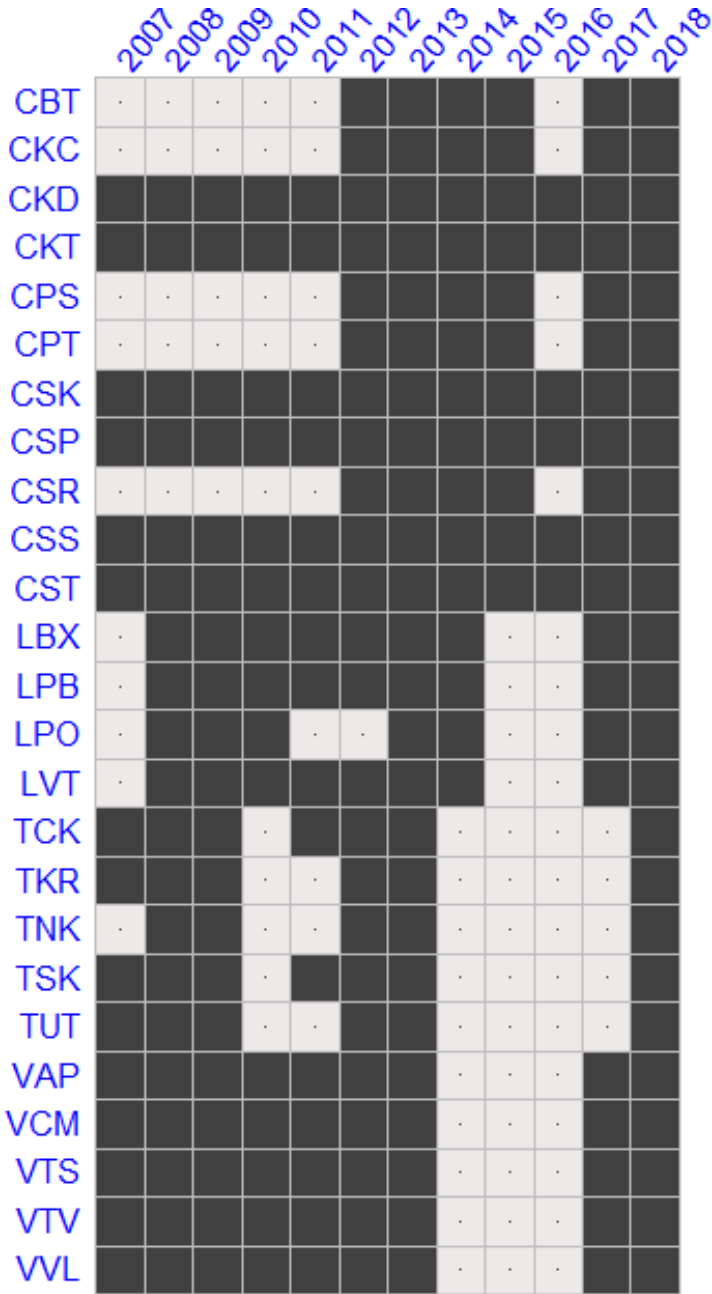

**Figure S2.** Top ten dominant species for years with a significant LCBD index. The abbreviations of the species names are indicated in the table right after the graph. The abbreviations of guild are defined in Table S3.

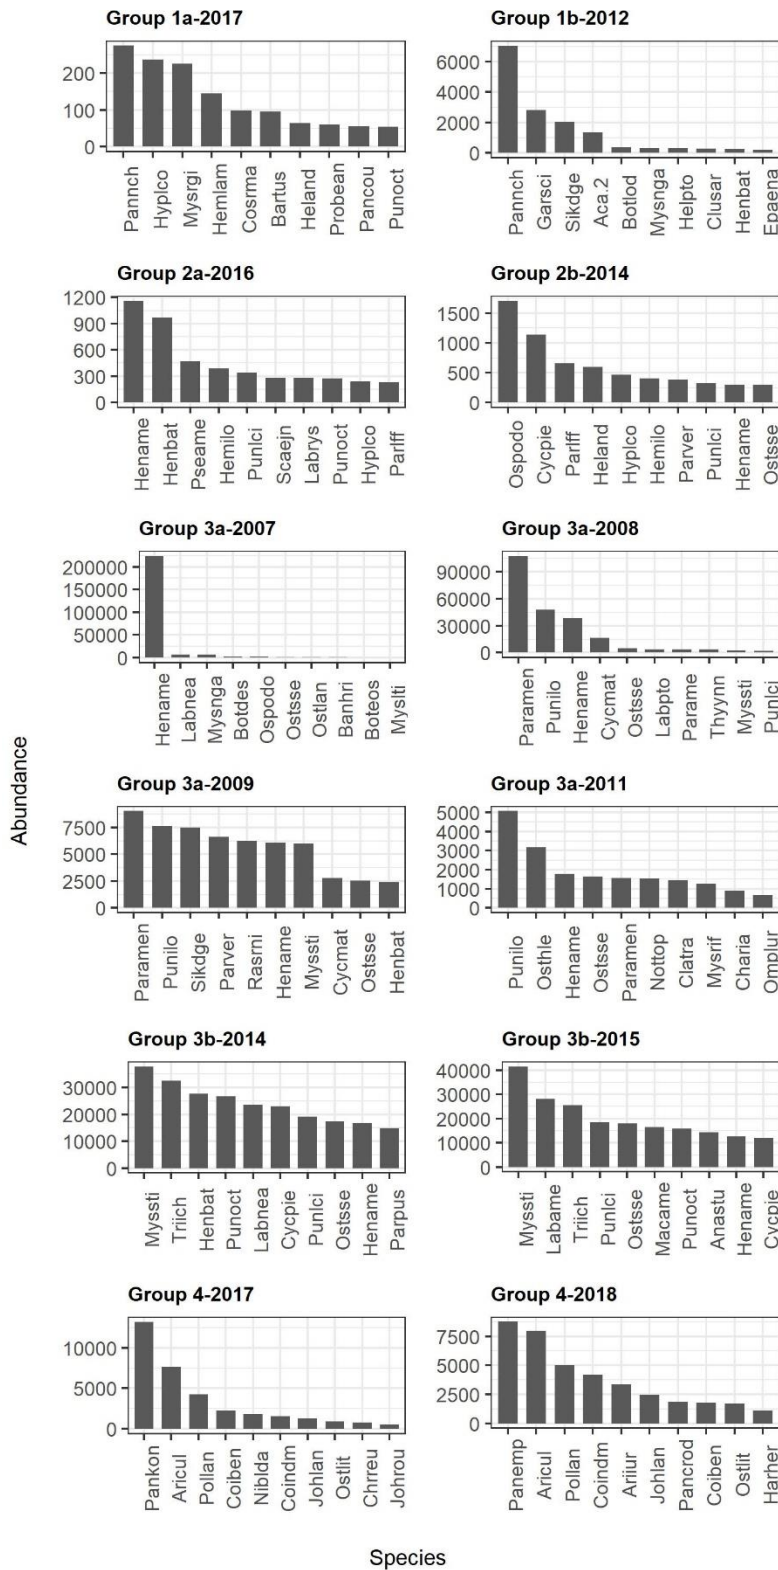

| Abbreviation | Species name                       | Guild | Abbreviation | Species name                     | Guild |
|--------------|------------------------------------|-------|--------------|----------------------------------|-------|
| Aca.2        | <i>Acanthopsis sp.2</i>            | G3    | Macame       | <i>Macrogathus siamensis</i>     | G6    |
| Anastu       | <i>Anabas testudineus</i>          | G6    | Mysrgi       | <i>Mystacoleucus marginatus</i>  | G1    |
| Aricul       | <i>Arius maculatus</i>             | G7    | Mysrif       | <i>Mystus atrifasciatus</i>      | G4    |
| Ariiur       | <i>Arius sciurus</i>               | G7    | Mysliti      | <i>Mystus multiradiatus</i>      | G4    |
| Banhri       | <i>Bangana behri</i>               | G3    | Mysnga       | <i>Mystus singaringan</i>        | G4    |
| Bartus       | <i>Barbonymus altus</i>            | G4    | Nottop       | <i>Notopterus notopterus</i>     | G5    |
| Boteos       | <i>Botia eos</i>                   | G3    | Omplur       | <i>Ompok siluroides</i>          | G4    |
| Botlod       | <i>Botia helodes</i>               | G3    | Ospodo       | <i>Osphronemus exodon</i>        | G1    |
| Botdes       | <i>Botia modesta</i>               | G3    | Ostsse       | <i>Osteochilus hasselti</i>      | G5    |
| Charia       | <i>Channa striata</i>              | G6    | Ostlan       | <i>Osteochilus melanopleura</i>  | G3    |
| Chrreu       | <i>Chrysochir aureus</i>           | G10   | Osthle       | <i>Osteochilus schlegeli</i>     | G3    |
| Clatra       | <i>Clarias batrachus</i>           | G6    | Ostlit       | <i>Osteogeneiosus militaris</i>  | G7    |
| Clusa        | <i>Clupeichthys aesarnensis</i>    | G3    | Pancou       | <i>Pangasius bocourti</i>        | G2    |
| Coiben       | <i>Coilia rebentischii</i>         | G10   | Panemp       | <i>Pangasius krempfi</i>         | G8    |
| Cosrma       | <i>Cosmochilus harmandi</i>        | G2    | Pankon       | <i>Pangasius mekongensis</i>     | G2    |
| Cycmat       | <i>Cyclocheilichthys armatus</i>   | G4    | Pancrod      | <i>Panna microdon</i>            | G10   |
| Cycpie       | <i>Cyclocheilichthys tapiensis</i> | G4    | Paramen      | <i>Parachela siamensis</i>       | G4    |
| Epaena       | <i>Epalzeorhynchus frenatum</i>    | G1    | Parver       | <i>Paralaubuca riveroi</i>       | G4    |
| Garsci       | <i>Garra fasciacauda</i>           | G1    | Parpus       | <i>Paralaubuca typus</i>         | G4    |
| Harher       | <i>Harpadon nehereus</i>           | G10   | Paramen      | <i>Parambassis siamensis</i>     | G5    |
| Helpto       | <i>Helicophagus leptorhynchus</i>  | G3    | Parlff       | <i>Parambassis wolffi</i>        | G4    |
| Heland       | <i>Helicophagus waandersii</i>     | G3    | Pollan       | <i>Polynemus melanochir</i>      | G7    |
| Hemlam       | <i>Hemibagrus filamentus</i>       | G3    | Probean      | <i>Probarbus labeaminor</i>      | G2    |
| Hemilo       | <i>Hemibagrus spilopterus</i>      | G3    | Pseame       | <i>Pseudomystus siamensis</i>    | G3    |
| Henbat       | <i>Henicorhynchus lobatus</i>      | G5    | Punlci       | <i>Puntioplites falcifer</i>     | G3    |
| Hename       | <i>Henicorhynchus siamensis</i>    | G5    | Punoct       | <i>Puntioplites proctozyron</i>  | G3    |
| Hypico       | <i>Hypsibarbus malcolmi</i>        | G3    | Punilo       | <i>Puntius spilopterus</i>       | G4    |
| Johlan       | <i>Johnius belangerii</i>          | G10   | Rasrni       | <i>Rasbora tornieri</i>          | G4    |
| Johrou       | <i>Johnius carouna</i>             | G10   | Scaejn       | <i>Scaphognathops stejneri</i>   | G3    |
| Labrys       | <i>Labeo chrysophekadion</i>       | G3    | Sikdge       | <i>Sikukia gudgeri</i>           | G4    |
| Labpto       | <i>Labiobarbus kuhli</i>           | G5    | Thyynn       | <i>Thynnichthys thynnoides</i>   | G4    |
| Labnea       | <i>Labiobarbus lineata</i>         | G5    | Triich       | <i>Trichogaster trichopterus</i> | G6    |
| Labame       | <i>Labiobarbus siamensis</i>       | G5    |              |                                  |       |

**Figure S3.** Fish relative abundance categorized by fish-bodied size per group. Yearly relative fish abundance data were clustered by SOM groups and then categorized by fish-bodied size: small size ( $\leq 25$  cm), medium size (26–60 cm), large size (61–99 cm) and giant size ( $\geq 100$  cm).

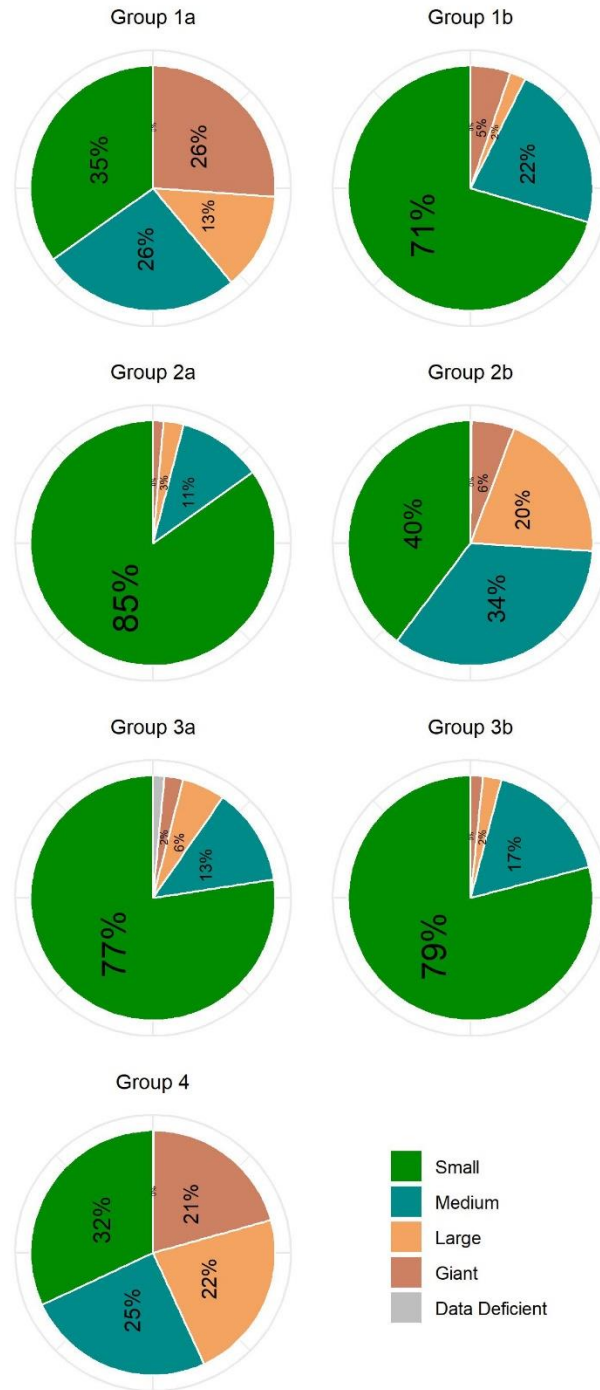

Figure S4. Distribution patterns of 119 indicator fish species on the SOM map.

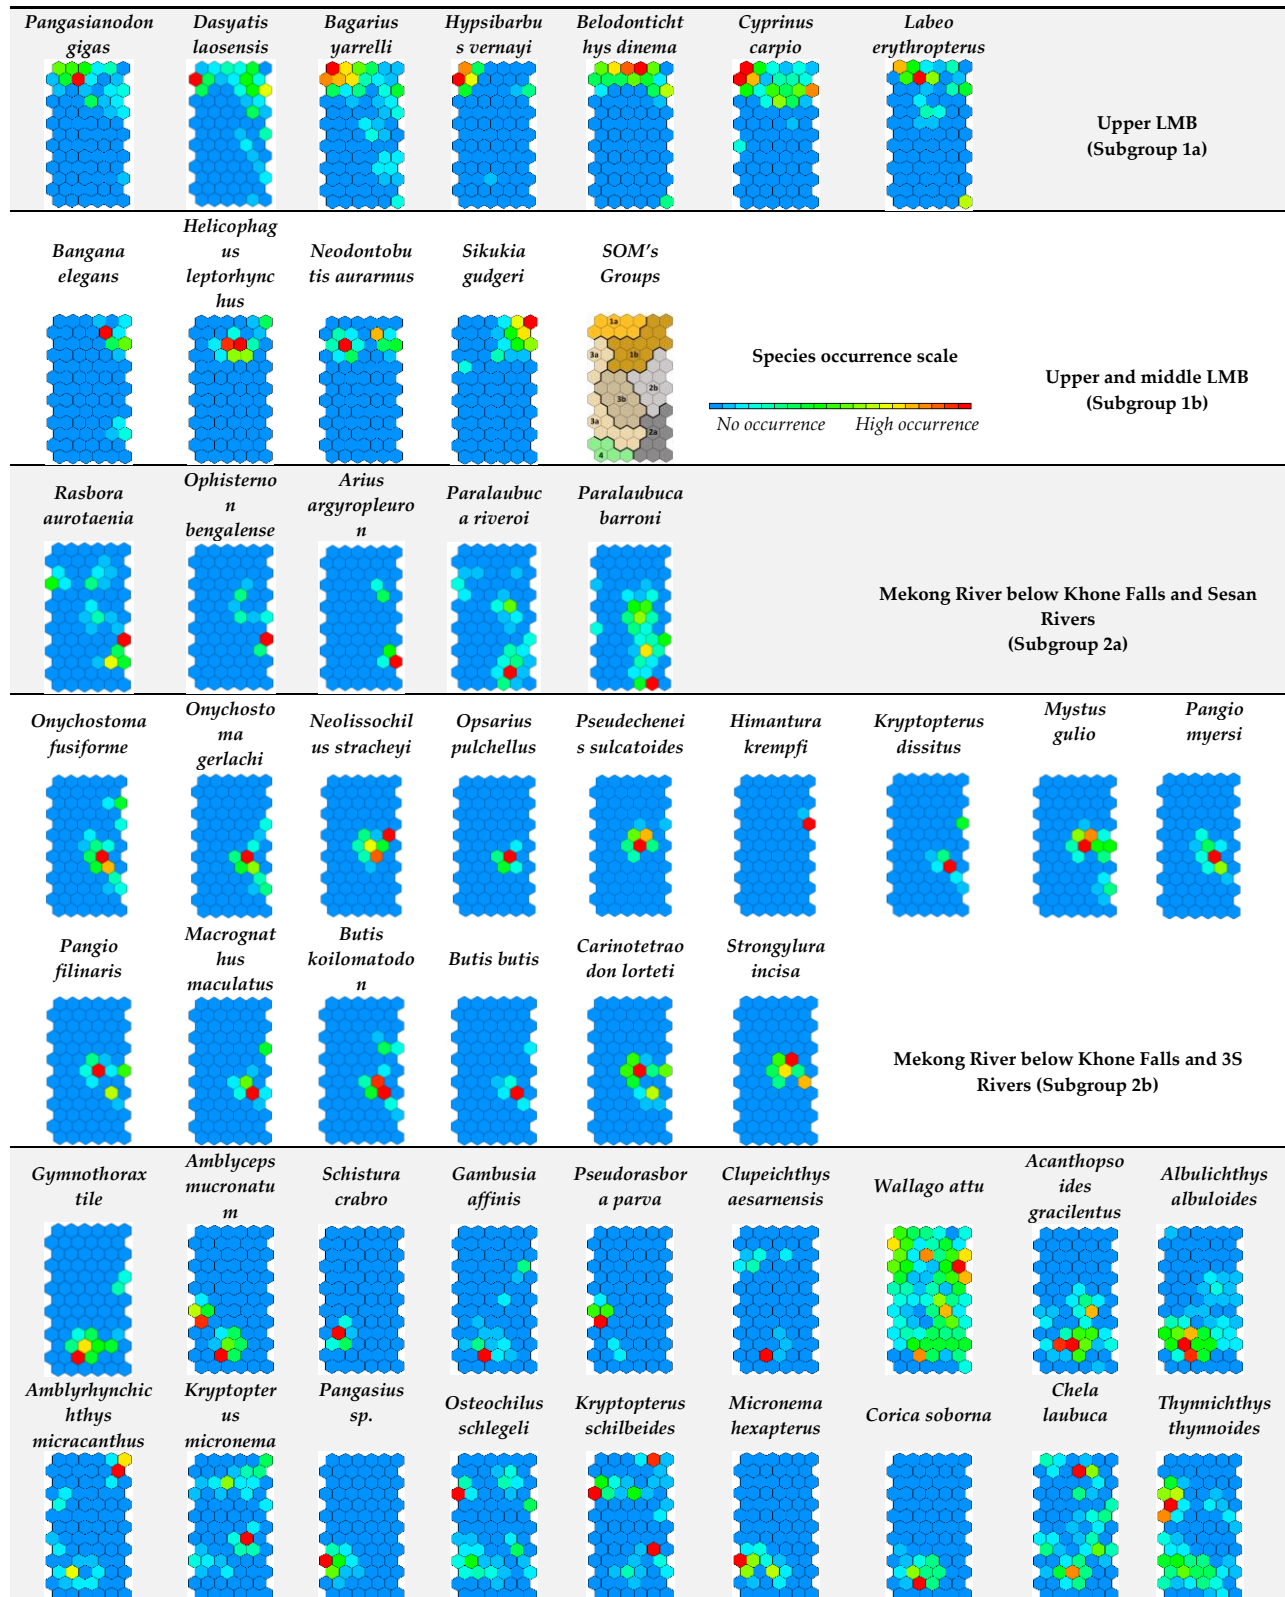

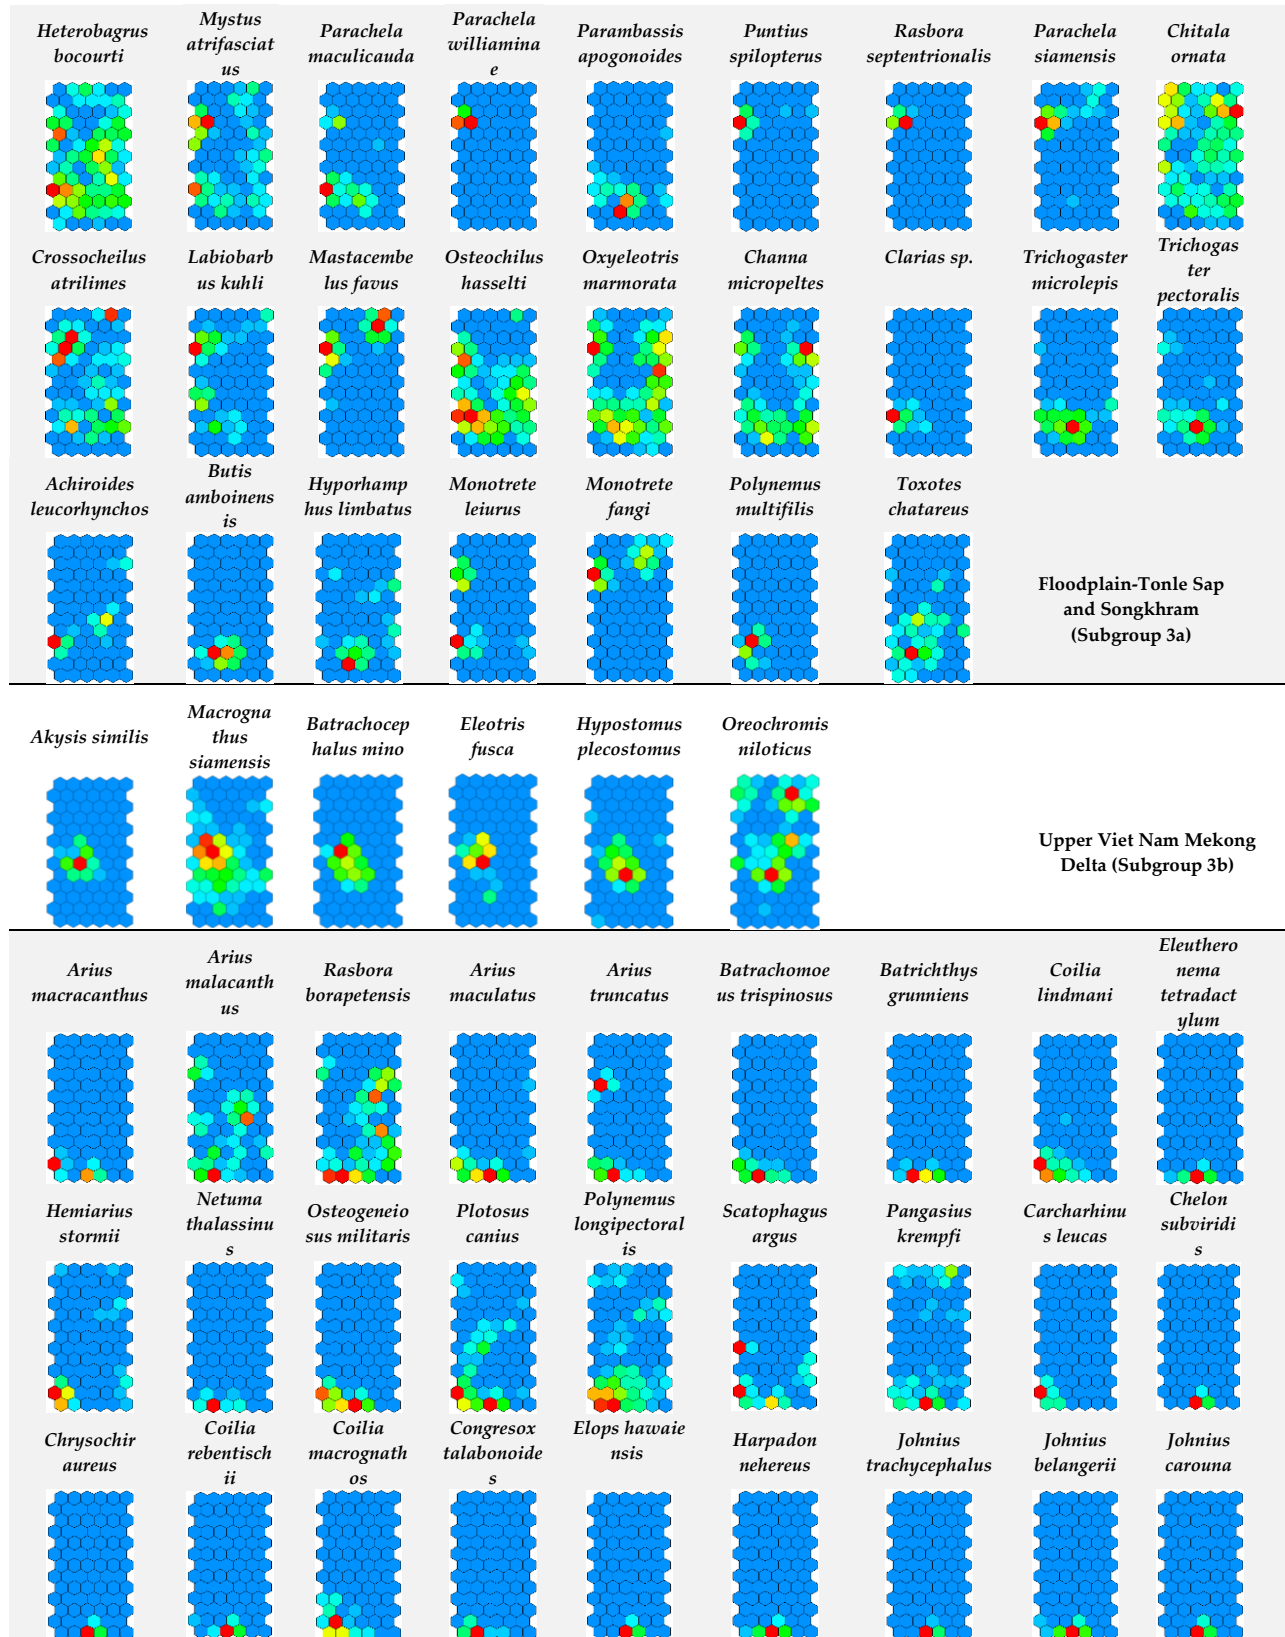

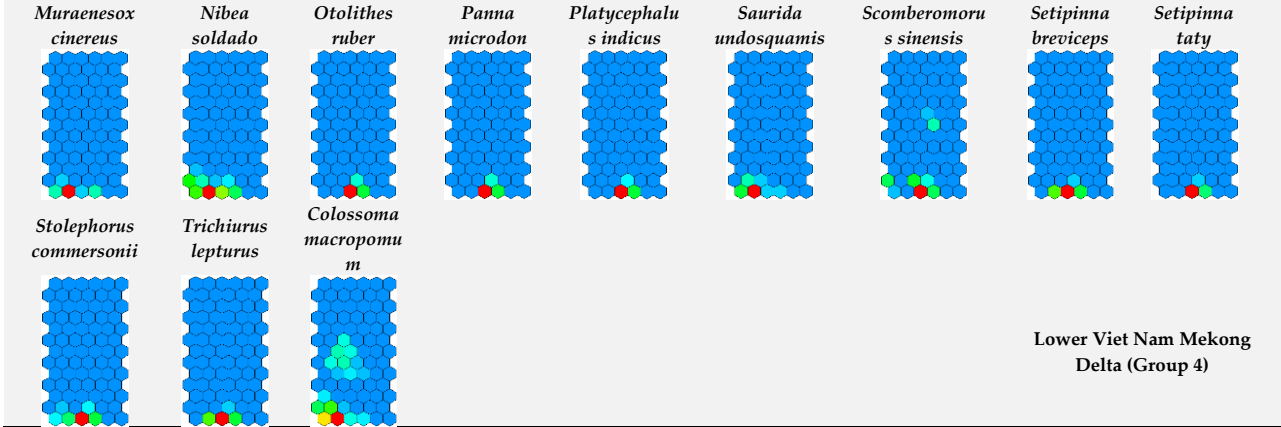



**Table S1.** Fish species in their ecologically distinct groups (Source: Mekong River Commission [1]).

| Fish Guilds                                          | Description                                                                                                                                                                                                                                                                                                                                                                                                                                                                                                                |
|------------------------------------------------------|----------------------------------------------------------------------------------------------------------------------------------------------------------------------------------------------------------------------------------------------------------------------------------------------------------------------------------------------------------------------------------------------------------------------------------------------------------------------------------------------------------------------------|
| Rhithron residents                                   | Resident in rapids torrents, rocky areas and pools in the rhithron                                                                                                                                                                                                                                                                                                                                                                                                                                                         |
| Main-channel residents or long-distance white fishes | <ul style="list-style-type: none"> <li>• Long distance migrants spawning in the main channel (sometimes in upper zone of the Mekong). Feeding habitat of upstream of adult in the main channel.</li> <li>• May migrate to refuges (deep pools) in the main channel during the dry season.</li> <li>• Pelagophilic members have drifting pelagic eggs or larval stages and return to adult habitats using backwaters and slacks as nurseries.</li> <li>• Adults do not enter floodplains and may be piscivorous.</li> </ul> |
| Main-channel spawners or short-distance white fishes | <ul style="list-style-type: none"> <li>• Spawn in the main channel, tributaries or margins upstream of floodplain feeding and nursery habitat often with pelagic eggs or larval stages.</li> <li>• Adults and drifting larvae return to floodplains to feed.</li> <li>• May migrate to refuges (deep pools) in the main channel during the dry season.</li> </ul>                                                                                                                                                          |
| Floodplain spawners or grey fishes                   | <ul style="list-style-type: none"> <li>• Migrates from floodplain feeding and spawning habitat to refuges (deep pools) in the main channel during the dry season.</li> <li>• Spawning occurs on the floodplain and main channel used as refuge during dry season.</li> </ul>                                                                                                                                                                                                                                               |
| Eurytopic or generalist fishes                       | <ul style="list-style-type: none"> <li>• Limited non-critical migrations in mainstream.</li> <li>• Highly adaptable, mobile and static elements in their genome make them highly adaptable to habitat modification.</li> </ul>                                                                                                                                                                                                                                                                                             |
| Floodplain residents or black fishes                 | <ul style="list-style-type: none"> <li>• Limited migrations between floodplains, pools, river margins, swamps, and inundated floodplains.</li> <li>• Tolerant to low oxygen concentrations or complete anoxia.</li> </ul>                                                                                                                                                                                                                                                                                                  |
| Estuarine residents                                  | Limited migrations within the estuary in response to daily and seasonal variations in salinity                                                                                                                                                                                                                                                                                                                                                                                                                             |
| Anadromous fishes                                    | <ul style="list-style-type: none"> <li>• Enters fresh/brackish waters to breed.</li> <li>• Enters freshwaters as larvae/juveniles to use the area as a nursery, either obligate or opportunistic.</li> </ul>                                                                                                                                                                                                                                                                                                               |
| Catadromous fishes                                   | <ul style="list-style-type: none"> <li>• Reproduction, early feeding, and growth at sea.</li> <li>• Juvenile or sub-adult migration to freshwater habitat, often penetrating far upstream.</li> </ul>                                                                                                                                                                                                                                                                                                                      |
| Marine visitors                                      | Enters estuaries opportunistically                                                                                                                                                                                                                                                                                                                                                                                                                                                                                         |
| Non-native fishes                                    | It is an introduced species or alien species.                                                                                                                                                                                                                                                                                                                                                                                                                                                                              |

**Table S2.** Beta diversity, LCBD indices per year and *p*-values (after 999 random permutations) of SOM group and subgroups. The LCBD indices for each group and subgroup are relative values summing to 1; LCBD indices that have *p*-values  $\leq 0.05$  are indicated in bold.

| (Sub)groups      | Beta Diversity | LCBD         |              |              |       |              |             |       |              |              |              |              |              |
|------------------|----------------|--------------|--------------|--------------|-------|--------------|-------------|-------|--------------|--------------|--------------|--------------|--------------|
|                  |                | 2007         | 2008         | 2009         | 2010  | 2011         | 2012        | 2013  | 2014         | 2015         | 2016         | 2017         | 2018         |
| Group 1a         | <b>0.22</b>    | –            | 0.10         | 0.06         | 0.09  | 0.07         | 0.07        | 0.07  | 0.08         | –            | –            | <b>0.46</b>  | –            |
| <i>P</i> -values |                | –            | 0.552        | 0.993        | 0.717 | 0.94         | 0.968       | 0.979 | 0.9          | –            | –            | <b>0.001</b> | –            |
| Group 1b         | <b>0.53</b>    | 0.10         | 0.08         | 0.07         | –     | 0.11         | <b>0.15</b> | 0.12  | 0.13         | –            | 0.13         | 0.07         | 0.05         |
| <i>P</i> -values |                | 0.474        | 0.896        | 0.898        | –     | 0.396        | <b>0.03</b> | 0.181 | 0.078        | –            | 0.095        | 0.959        | 1            |
| Group 2a         | <b>0.24</b>    | 0.07         | 0.08         | 0.08         | 0.10  | 0.04         | 0.08        | 0.05  | 0.10         | 0.13         | <b>0.25</b>  | –            | –            |
| <i>P</i> -values |                | 0.626        | 0.555        | 0.548        | 0.345 | 0.983        | 0.627       | 0.945 | 0.424        | 0.212        | <b>0.004</b> | –            | –            |
| Group 2b         | <b>0.19</b>    | 0.07         | 0.09         | 0.08         | 0.06  | 0.08         | 0.08        | 0.07  | <b>0.14</b>  | 0.07         | 0.07         | 0.08         | 0.10         |
| <i>P</i> -values |                | 0.805        | 0.295        | 0.526        | 0.958 | 0.489        | 0.527       | 0.839 | <b>0.001</b> | 0.939        | 0.821        | 0.403        | 0.135        |
| Group 3a         | <b>0.45</b>    | <b>0.17</b>  | <b>0.15</b>  | <b>0.13</b>  | –     | <b>0.16</b>  | 0.06        | 0.04  | 0.06         | 0.06         | –            | 0.08         | 0.08         |
| <i>P</i> -values |                | <b>0.001</b> | <b>0.016</b> | <b>0.043</b> | –     | <b>0.001</b> | 0.995       | 1     | 0.994        | 1            | –            | 0.878        | 0.799        |
| Group 3b         | <b>0.19</b>    | 0.08         | 0.06         | 0.06         | 0.07  | 0.04         | 0.05        | 0.05  | <b>0.21</b>  | <b>0.17</b>  | –            | 0.10         | 0.11         |
| <i>P</i> -values |                | 0.585        | 0.87         | 0.963        | 0.794 | 0.996        | 0.987       | 0.999 | <b>0.001</b> | <b>0.001</b> | –            | 0.383        | 0.199        |
| Group 4          | <b>0.33</b>    | 0.16         | 0.05         | 0.04         | 0.04  | 0.04         | 0.06        | 0.08  | –            | –            | –            | <b>0.27</b>  | <b>0.26</b>  |
| <i>P</i> -values |                | 0.098        | 0.888        | 0.984        | 0.993 | 0.994        | 0.923       | 0.803 | –            | –            | –            | <b>0.002</b> | <b>0.004</b> |

**Table S3.** Indicator species identified for each SOM group in the LMB: G1 = rhithron residents; G2 = long-distant white fishes; G3 = short-distant white fishes; G4 = grey fishes; G5 = generalist fishes; G6 = black fishes; G7 = estuarine residents; G8 = anadromous fishes; G9 = catadromous fishes; G10 = marine visitors; G11 = non-native fishes.

| (Sub)group                | Indicator Species                      | Indicator Value | Significant Level | Guild |
|---------------------------|----------------------------------------|-----------------|-------------------|-------|
| 1a                        | <i>Bagarius yarrelli</i>               | 0.908           | ***               | G1    |
|                           | <i>Belodontichthys dinema</i>          | 0.865           | ***               | G11   |
|                           | <i>Cyprinus carpio</i>                 | 0.793           | ***               | G11   |
|                           | <i>Hypsibarbus vernayi</i>             | 0.693           | ***               | G3    |
|                           | <i>Labeo erythropterus</i>             | 0.521           | ***               | G11   |
|                           | <i>Pangasianodon gigas</i>             | 0.485           | ***               | G2    |
|                           | <i>Dasyatis laosensis</i>              | 0.466           | **                | G3    |
| 1b                        | <i>Bangana elegans</i>                 | 0.295           | *                 | G3    |
|                           | <i>Helicophagus leptorhynchus</i>      | 0.600           | ***               | G3    |
|                           | <i>Neodontobutis aurarmus</i>          | 0.289           | *                 | G4    |
|                           | <i>Sikukia gudgeri</i>                 | 0.698           | ***               | G4    |
| 2a                        | <i>Plicofollis argyropleuron</i>       | 0.311           | *                 | G7    |
|                           | <i>Ophisternon bengalense</i>          | 0.408           | **                | G7    |
|                           | <i>Paralaubuca barroni</i>             | 0.699           | ***               | G4    |
|                           | <i>Paralaubuca riveroi</i>             | 0.830           | ***               | G4    |
|                           | <i>Rasbora aurotaenia</i>              | 0.487           | **                | G4    |
| 2b                        | <i>Butis koilomatodon</i>              | 0.415           | **                | G7    |
|                           | <i>Butis butis</i>                     | 0.362           | **                | G7    |
|                           | <i>Carinotetraodon lorteti</i>         | 0.274           | *                 | G7    |
|                           | <i>Himantura krempfi</i>               | 0.274           | *                 | G3    |
|                           | <i>Kryptopterus dissitus</i>           | 0.415           | **                | G3    |
|                           | <i>Macrognathus maculatus</i>          | 0.343           | *                 | G6    |
|                           | <i>Mystus gulio</i>                    | 0.462           | **                | G4    |
|                           | <i>Neolissochilus stracheyi</i>        | 0.316           | **                | G1    |
|                           | <i>Onychostoma gerlachi</i>            | 0.379           | *                 | G1    |
|                           | <i>Onychostoma fusiforme</i>           | 0.502           | **                | G1    |
|                           | <i>Opsarius pulchellus</i>             | 0.274           | *                 | G1    |
|                           | <i>Pangio myersi</i>                   | 0.316           | *                 | G4    |
|                           | <i>Pangio filinaris</i>                | 0.274           | *                 | G4    |
|                           | <i>Pseudecheneis sulcatoides</i>       | 0.274           | *                 | G1    |
| <i>Strongylura incisa</i> | 0.274                                  | *               | G10               |       |
| 3a                        | <i>Acanthopsoides gracilentus</i>      | 0.376           | *                 | G3    |
|                           | <i>Achiroides leucorhynchus</i>        | 0.369           | *                 | G7    |
|                           | <i>Albulichthys albuloides</i>         | 0.739           | ***               | G3    |
|                           | <i>Amblyrhynchichthys micracanthus</i> | 0.407           | *                 | G3    |
|                           | <i>Amblyceps mucronatum</i>            | 0.345           | **                | G1    |
|                           | <i>Butis amboinensis</i>               | 0.345           | **                | G7    |
|                           | <i>Channa micropeltes</i>              | 0.862           | ***               | G6    |
|                           | <i>Chela laubuca</i>                   | 0.507           | *                 | G4    |
|                           | <i>Chitala ornata</i>                  | 0.823           | ***               | G5    |
|                           | <i>Clarias sp.</i>                     | 0.488           | ***               | G6    |
|                           | <i>Clupeichthys aesarnensis</i>        | 0.436           | *                 | G3    |
|                           | <i>Corica soborna</i>                  | 0.408           | ***               | G3    |
|                           | <i>Crossocheilus atrilimes</i>         | 0.571           | ***               | G5    |
|                           | <i>Gambusia affinis</i>                | 0.435           | **                | G11   |

|    |                                    |       |     |                |
|----|------------------------------------|-------|-----|----------------|
|    | <i>Gymnothorax tile</i>            | 0.436 | **  | G10            |
|    | <i>Heterobagrus bocourti</i>       | 0.901 | *** | G4             |
|    | <i>Hyporhamphus limbatus</i>       | 0.487 | **  | G7             |
|    | <i>Kryptopterus micronema</i>      | 0.683 | *** | G3             |
|    | <i>Kryptopterus schilbeides</i>    | 0.428 | *   | G3             |
|    | <i>Labiobarbus kuhli</i>           | 0.615 | *** | G5             |
|    | <i>Mastacembelus favus</i>         | 0.334 | *   | G5             |
|    | <i>Micronema hexapterus</i>        | 0.463 | *** | G3             |
|    | <i>Monotrete leiurus</i>           | 0.488 | *** | G7             |
|    | <i>Monotrete fangi</i>             | 0.331 | *   | G7             |
|    | <i>Mystus atrifasciatus</i>        | 0.828 | *** | G4             |
|    | <i>Osteochilus schlegeli</i>       | 0.623 | *** | G3             |
|    | <i>Osteochilus hasselti</i>        | 0.942 | *** | G5             |
|    | <i>Oxyeleotris marmorata</i>       | 0.919 | *** | G5             |
|    | <i>Pangasius sp.</i>               | 0.552 | **  | G3             |
|    | <i>Parachela siamensis</i>         | 0.571 | *** | G4             |
|    | <i>Parachela maculicauda</i>       | 0.613 | *** | G4             |
|    | <i>Parachela williaminae</i>       | 0.378 | **  | G4             |
|    | <i>Parambassis apogonoides</i>     | 0.488 | **  | G4             |
|    | <i>Polynemus multifilis</i>        | 0.309 | *   | G7             |
|    | <i>Pseudorasbora parva</i>         | 0.345 | *   | G11            |
|    | <i>Puntius spilopterus</i>         | 0.488 | **  | G4             |
|    | <i>Rasbora septentrionalis</i>     | 0.344 | *   | G4             |
|    | <i>Schistura crabro</i>            | 0.267 | *   | G1             |
|    | <i>Thynnichthys thynnoides</i>     | 0.914 | *** | G4             |
|    | <i>Toxotes chatareus</i>           | 0.417 | *   | G7             |
|    | <i>Trichogaster microlepis</i>     | 0.883 | *** | G6             |
|    | <i>Trichogaster pectoralis</i>     | 0.844 | *** | G6             |
|    | <i>Wallago attu</i>                | 0.883 | *** | G3             |
|    | <i>Akysis similis</i>              | 0.385 | **  | G3             |
|    | <i>Batrachocephalus mino</i>       | 0.333 | **  | G7             |
|    | <i>Eleotris fusca</i>              | 0.365 | *   | G7             |
| 3b | <i>Hypostomus plecostomus</i>      | 0.921 | *** | G3             |
|    | <i>Macrornathus siamensis</i>      | 0.907 | *** | G6             |
|    | <i>Oreochromis niloticus</i>       | 0.732 | *** | G11            |
|    | <i>Arius macracanthus</i>          | 0.333 | *   | Data Deficient |
|    | <i>Arius maculatus</i>             | 0.998 | *** | G7             |
|    | <i>Arius malacanthus</i>           | 0.347 | *   | G7             |
|    | <i>Arius truncatus</i>             | 0.401 | **  | G7             |
|    | <i>Batrachomoeus trispinosus</i>   | 0.816 | *** | G7             |
|    | <i>Batrachichthys grunniens</i>    | 0.408 | *** | G7             |
|    | <i>Carcharhinus leucas</i>         | 0.471 | *** | G10            |
|    | <i>Chelon subviridis</i>           | 0.408 | *** | G10            |
| 4  | <i>Chrysochir aureus</i>           | 0.333 | **  | G10            |
|    | <i>Coilia rebenischii</i>          | 0.524 | *** | G10            |
|    | <i>Coilia macrognathos</i>         | 0.832 | *** | G10            |
|    | <i>Coilia lindmani</i>             | 0.865 | *** | G7             |
|    | <i>Colossoma macropomum</i>        | 0.804 | *** | G11            |
|    | <i>Congresox talabonoides</i>      | 0.333 | **  | G10            |
|    | <i>Eleutheronema tetradactylum</i> | 0.707 | *** | G7             |
|    | <i>Elops hawaiiensis</i>           | 0.333 | **  | G10            |
|    | <i>Harpadon nehereus</i>           | 0.707 | *** | G10            |

|                                  |       |     |     |
|----------------------------------|-------|-----|-----|
| <i>Hemiaris stormii</i>          | 0.875 | *** | G7  |
| <i>Johnius trachycephalus</i>    | 0.333 | **  | G10 |
| <i>Johnius belangerii</i>        | 0.667 | *** | G10 |
| <i>Johnius carouna</i>           | 0.333 | **  | G10 |
| <i>Muraenesox cinereus</i>       | 0.471 | *** | G10 |
| <i>Netuma thalassinus</i>        | 0.744 | *** | G7  |
| <i>Nibea soldado</i>             | 0.913 | *** | G10 |
| <i>Osteogeneiosus militaris</i>  | 1.000 | *** | G7  |
| <i>Otolithes ruber</i>           | 0.333 | **  | G10 |
| <i>Panna microdon</i>            | 0.527 | *** | G10 |
| <i>Pangasius krempfi</i>         | 0.906 | *** | G8  |
| <i>Platycephalus indicus</i>     | 0.408 | *** | G10 |
| <i>Plotosus canius</i>           | 0.886 | *** | G7  |
| <i>Polynemus longipectoralis</i> | 0.770 | *** | G7  |
| <i>Rasbora borapetensis</i>      | 0.478 | *   | G4  |
| <i>Saurida undosquamis</i>       | 0.333 | **  | G10 |
| <i>Scatophagus argus</i>         | 0.562 | *** | G7  |
| <i>Scomberomorus sinensis</i>    | 0.561 | *** | G10 |
| <i>Setipinna breviceps</i>       | 0.408 | *** | G10 |
| <i>Setipinna taty</i>            | 0.333 | **  | G10 |
| <i>Stolephorus commersonii</i>   | 0.333 | **  | G10 |
| <i>Trichiurus lepturus</i>       | 0.333 | **  | G10 |

---

\* Significance ( $P \leq 0.05$ ); \*\* Significance ( $P \leq 0.01$ ); \*\*\* Significance ( $P \leq 0.001$ )

## References

1. Mekong River Commission. *The Council Study: The Study on Sustainable Management and Development of the Mekong River, including Impacts of Mainstream Hydropower Projects. Biological Resource Assessment Final Technical Report Series. Volume 1: Specialists' Report*; Mekong River Commission Secretariat: Vientiane, Lao PDR, 2017; Volume 1.

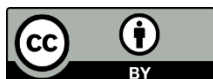

© 2020 by the authors. Licensee MDPI, Basel, Switzerland. This article is an open access article distributed under the terms and conditions of the Creative Commons Attribution (CC BY) license (<http://creativecommons.org/licenses/by/4.0/>).
